# Supplementary material for: Alternation of Generations and Experimental Design: A Guided-Inquiry Lab Exploring the Nature of theher1Developmental Mutant ofCeratopteris richardii(C-Fern)
Source: Atypon-hosted journal article supplement (doi:10.1187/cbe.07-82-88), 2008-03-01
Supplement: suppc.pdf [file suppc.pdf]

## Appendix C – Posttest Assessment

The pretest and posttest assessments are identical for Questions 1-5. Questions 6-12 were included only in the posttest assessment.

Name \_\_\_\_\_

Lab Section: Day: \_\_\_\_\_, morning / afternoon

**Post-lab assessment quiz:** This quiz will not affect your grade, but will provide an assessment tool for measuring the effectiveness of the lab exercise that you carried out in the past two weeks. Please answer these questions to the best of your ability, on your own and without notes. This will help us to continue improving these lab exercises. Thank you.

1. In the plant life cycle the haploid generation is known as the
  - a) sporophyte
  - b) gametophyte
  - c) bryophyte
  - d) flower
  - e) seed
2. The male gamete, sperm, is formed within which structure?
  - a) rhizoid
  - b) sporangia
  - c) antheridia
  - d) archegonia
  - e) zygote
3. The product of meiosis in the plant life cycle is the...
  - a) gamete
  - b) spore
  - c) gametophyte
  - d) zygote
4. An experiment was set up to test the most effective dose of a new drug, nicoquit, that has been reported to help people quit smoking.  
In this experiment, the dose of the drug given to the participants can be considered the ...
  - a) dependent variable
  - b) independent variable
  - c) control variable
5. In the same experiment, those smokers, who did not receive the drug can be considered to be part of
  - a) a treatment group
  - b) a negative control group
  - c) a positive control group

In the following questions, please circle the answer that applies.

6. Have you ever covered the plant life cycle in a previous course (in high school or college)?

YES

NO

7. Have you ever covered experimental design in a previous course (in high school or college)?

YES

NO

8. Did you take advanced placement (AP) biology in high school?

YES

NO

9. This lab improved my understanding of the plant life cycle.

**5** = Agree Strongly, **4** = Agree, **3** = Neutral/Mixed, **2** = Disagree, **1** = Disagree Strongly

10. This lab improved my understanding of experimental design.

**5** = Agree Strongly, **4** = Agree, **3** = Neutral/Mixed, **2** = Disagree, **1** = Disagree Strongly

11. Covering material in lecture and seeing it again in lab is useful and helps me learn the material more effectively.

**5** = Agree Strongly, **4** = Agree, **3** = Neutral/Mixed, **2** = Disagree, **1** = Disagree Strongly

12. Covering material in lecture and seeing it again in lab is redundant and a waste of my time.

**5** = Agree Strongly, **4** = Agree, **3** = Neutral/Mixed, **2** = Disagree, **1** = Disagree Strongly
